# Supplementary material
Source: PubMed Central journal article supplement (PMC10147389)

**Supplemental Table 1.** Comparison of the demographic and clinical characteristics of patients with invasive *Haemophilus influenzae* serotype a disease by availability of bacterial isolate.

| <b>Demographic Characteristics</b>          | <b>Isolate Available<br/>(n=28)</b> | <b>Isolate Unavailable<br/>(n=23)</b> |
|---------------------------------------------|-------------------------------------|---------------------------------------|
| Age months, median (IQR)                    | 8.8 (4.2-35)                        | 13.3 (7.8-43.3)                       |
| Age group, n (%)                            |                                     |                                       |
| <1 year                                     | 16 (57.4)                           | 11 (47.8)                             |
| 1-4 years                                   | 10 (35.7)                           | 10 (43.5)                             |
| 5-17 years                                  | 2 (7.1)                             | 2 (8.7)                               |
| Male sex, n (%)                             | 11 (39.3)                           | 16 (69.6)                             |
| Race/ethnicity, n (%)                       |                                     |                                       |
| White                                       | 20 (71.4)                           | 19 (82.6)                             |
| Black                                       | 2 (7.1)                             | 0                                     |
| Asian / Native Hawaiian / Pacific Islander  | 1 (3.6)                             | 1 (4.3)                               |
| Hispanic                                    | 2 (7.1)                             | 1 (4.3)                               |
| American Indian / Alaskan Native            | 1 (3.6)                             | 0                                     |
| Unknown                                     | 2 (7.1)                             | 2 (8.7)                               |
| <b>Clinical Characteristics</b>             |                                     |                                       |
| Disease classification, n (%)               |                                     |                                       |
| Meningitis <sup>a</sup>                     | 15 (53.6)                           | 12 (52.2)                             |
| Pneumonia with bacteremia                   | 4 (14.3)                            | 3 (13)                                |
| Septic arthritis <sup>a</sup>               | 3 (10.7)                            | 4 (17.4)                              |
| Bacteremia (All other sources) <sup>b</sup> | 6 (21.4)                            | 4 (17.4)                              |
| Outcomes                                    |                                     |                                       |
| Hospital admission, n (%)                   | 28 (100)                            | 21 (91.3)                             |
| Hospital LOS, days, median (IQR)            | 8 (3-14)                            | 3 (1-7)                               |
| ICU admission, n (%)                        | 16 (57.1)                           | 6 (26.1)                              |
| ICU LOS, days, median (IQR)                 | 1.9 (1.3-5.2)                       | 3.8 (2-29.1)                          |
| Death, n (%)                                | 1 (3.4)                             | 0                                     |

Abbreviations: IQR, Inter-quartile range; CLABSI, Central line associated blood stream infection; ICU, Intensive care unit; LOS, Length of stay

<sup>a</sup>One patient was classified as having both arthritis and meningitis

<sup>b</sup>Bacteremia was in association with central line associated blood stream infection (1), peritonitis (1), acute otitis media (3), or no identifiable source (4).

**Supplemental Figure 1.** Number of invasive *Haemophilus influenzae* serotype a infections in Utah children from 2007 to 2017 by multi-locus sequence type (ST).

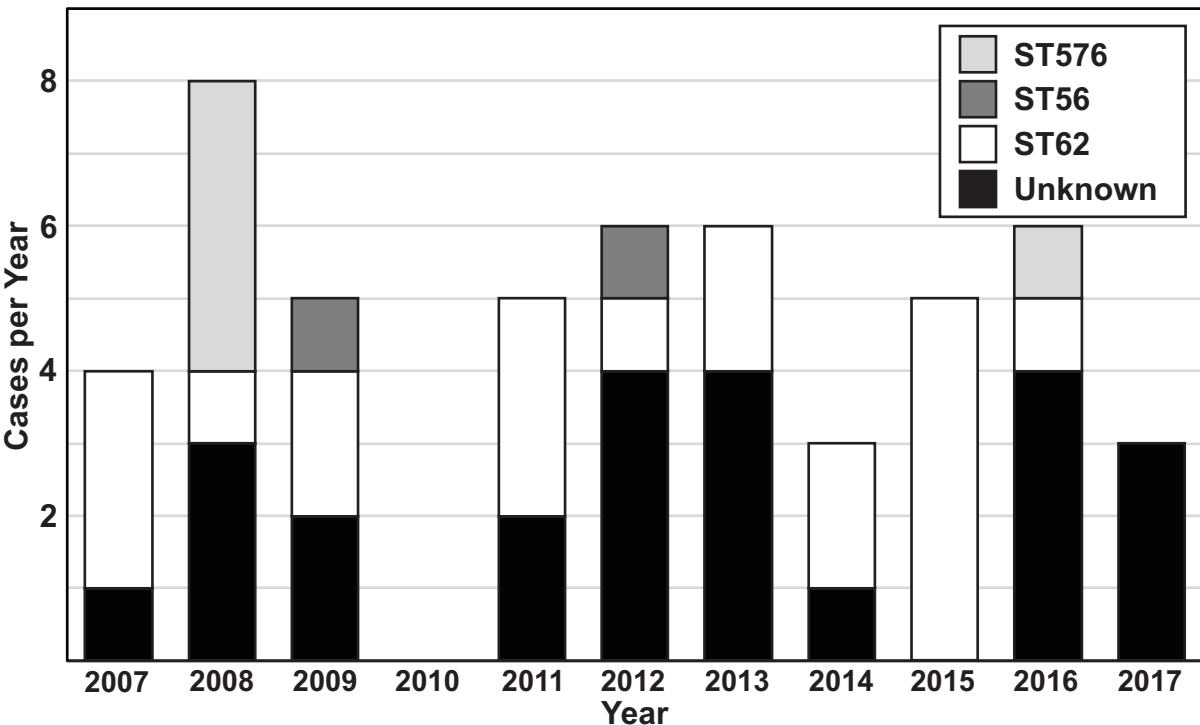

Supplement: piz088_suppl_supplementary_material.pdf [file piz088_suppl_supplementary_material.pdf]
